# Supplementary material
Source: Springer Nature journal article supplement (https://www.springermedizin.de/resource/supplementary/12885_2010_2260_MOESM5_ESM.pdf/9460878)

**A**

24 h

48 h

0 nM

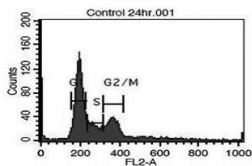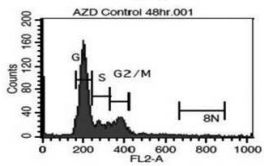

5 nM

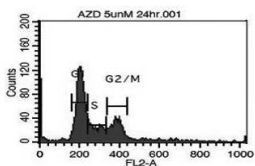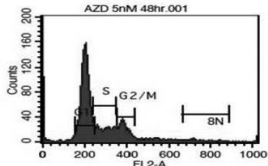

25 nM

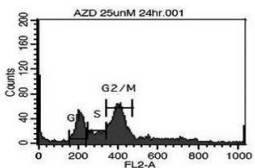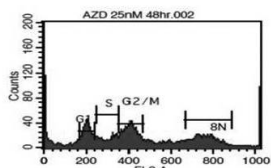

125 nM

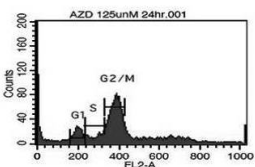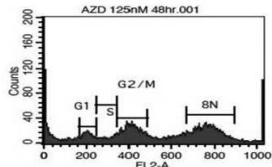**B**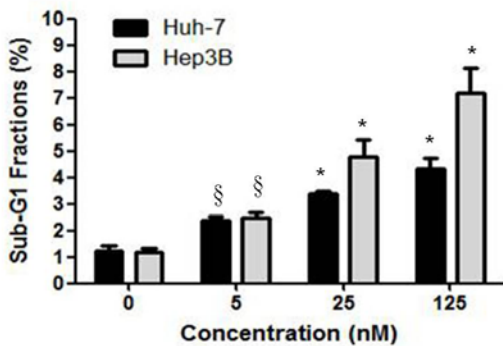

Supplement: MOESM5 [file 9460878]
